## **Eastern Diet - A Healthful Dietary Pattern from Eastern China:**

### **Its Characteristics and Relation to Adiposity, Cardiometabolic Diseases,**

### **Mortality and Gut Microbiota**

Yuwei Shi, BS<sup>1,2#</sup>; Juntao Kan, PhD<sup>3#</sup>; Xinmei Li, BS<sup>1,2</sup>; Ying Jiang, MPH<sup>1,2</sup>;  
Changzheng Yuan, ScD<sup>4</sup>; Ningling Wang, PhD<sup>5</sup>; Yufan Hao, BS<sup>1,2</sup>; Qiaoyu Wu, BS<sup>1,2</sup>;  
Emma Yunzhi Huang, PhD<sup>3</sup>; Fei Yang, PhD<sup>1,2</sup>; Joyce Wu, MS<sup>6</sup>; April Myers, MS<sup>6</sup>;  
Ann W. Hsing, PhD<sup>6,7,8</sup>; Jun Du, PhD<sup>3\*</sup>; Wei He, PhD<sup>1,2\*</sup>; Shankuan Zhu, MD, PhD<sup>1,2\*</sup>

1. Chronic Disease Research Institute, The Children's Hospital, and National Clinical Research Center for Child Health, School of Public Health, School of Medicine, Zhejiang University, Hangzhou, Zhejiang, China
2. Department of Nutrition and Food Hygiene, School of Public Health, Zhejiang University, Hangzhou, Zhejiang, China
3. Nutrilite Health Institute, Shanghai, China
4. School of Public Health, the Second Affiliated Hospital, Zhejiang University School of Medicine, Hangzhou, China
5. Karolinska Institute, Stockholm, Sweden
6. Stanford Prevention Research Center, Department of Medicine, Stanford School of Medicine, Stanford University, Palo Alto, CA, USA
7. Department of Epidemiology and Population Health, Stanford School of Medicine, Stanford University, Palo Alto, CA, USA
8. Stanford Cancer Institute, Stanford School of Medicine, Stanford University, Palo Alto, CA, USA

Short title: Eastern Diet, Cardiometabolic Health and Mortality

#: Contributed equally as first authors

\*: Corresponding authors:

Jun Du, PhD, Nutrilite Health Institute, 720 Cailun Road, Shanghai 201203, China.

Email: [eric.du@amway.com](mailto:eric.du@amway.com).

Wei He, PhD, Chronic Disease Research Institute, The Children's Hospital, National Clinical Research Center for Child Health, School of Public Health, School of Medicine, Zhejiang University, 866 Yu-hang-tang Road, Hangzhou, Zhejiang, 310058 China. Email: [zjuhewei@zju.edu.cn](mailto:zjuhewei@zju.edu.cn).

Shankuan Zhu, MD, PhD, Chronic Disease Research Institute, The Children's Hospital, National Clinical Research Center for Child Health, School of Public Health, School of Medicine, Zhejiang University, 866 Yu-hang-tang Road, Hangzhou, Zhejiang, 310058 China. Email: [zsk@zju.edu.cn](mailto:zsk@zju.edu.cn)

Word count: 6,241 words

## **Abstract**

**Background:** The dietary pattern along the downstream of the Yangtze River in Eastern China has garnered widespread attention for its potential health benefits; however, population-based evidence is limited. This study aimed to identify and characterize this dietary pattern, develop a dietary pattern index, and evaluate its associations with adiposity, cardiometabolic diseases, mortality, and gut microbiota.

**Methods:** This study included 8,852 adults aged 18-80 from the WELL-China cohort in Hangzhou, Eastern China, between 2016 to 2019. Dietary intake was assessed using a validated food frequency questionnaire. We adopted K-means clustering to identify the Eastern Diet (EastDiet) pattern within the study population and developed a dietary index to quantify adherence to the EastDiet. Adiposity was characterized by total and regional fat measured via dual-energy x-ray absorptiometry. Incident cardiometabolic diseases were documented through October 2022. In addition, we extrapolated the EastDiet index to a nationwide representative cohort of old individuals, including 13,773 participants of the Chinese Longitudinal Healthy Longevity Survey (CLHLS), followed from 2008 to 2018. Linear regression and Cox proportional models were used to assess the associations of the EastDiet index with the study outcomes.

**Results:** In the WELL-China, we identified an EastDiet pattern emphasizing high consumption of plant-based foods and low consumption of refined grains and red meat, aligning with previously reported healthy eating habits in Eastern China. The EastDiet index was constructed based on intake levels of 12 food groups. Higher

EastDiet adherence was significantly associated with lower level of overall adiposity (BMI and body fat percentage) and central adiposity (waist-hip ratio and android-gynoid fat ratio), reduced incident cardiometabolic diseases ( $HR_{\text{high v.s, low}} = 0.65$ , 95% CI: 0.43-0.97), and higher gut microbial diversity and abundance of beneficial genera. In the CLHLS, individuals living in the eastern regions had higher EastDiet index scores compared to other regions of China. Higher EastDiet adherence was also associated with decreased mortality.

**Conclusion:** Higher adherence to the EastDiet was associated with more favorable cardiometabolic outcomes, reduced mortality risk, and improved diversity and taxonomy of gut microbiota. These findings support that the EastDiet identified in this study, could be considered an important healthy dietary pattern for Chinese adults.

**Key words:** Eastern Diet; adiposity; cardiometabolic diseases; all-cause mortality; gut microbiota

## Introduction

Dietary patterns, reflecting the habitual combinations of foods consumed over time, are critical determinants of global health and well-being.<sup>1</sup> These patterns, which include the complex interactions and synergies among various dietary components, provide a holistic view of nutrition beyond the scope of single nutrients or foods.<sup>2,3</sup> In China, there has been a shift from traditional diets rich in whole grains and vegetables to those higher in fats and energy, a transition associated with the rising prevalence of chronic metabolic disorders.<sup>4,6</sup> With China having over one-sixth of the world's population, the discovery of a habitually healthy diet in China has significant implications for public health worldwide.

Intriguingly, regions such as the Yangtze River Delta on the east coast of China exhibit higher average life expectancies and lower rates of obesity and cardiovascular events compared to other regions of the country, particularly northern China.<sup>7,8</sup> This observation suggests that regional dietary habits might influence health outcomes.<sup>9</sup> The dietary pattern of the Yangtze River Delta on the east coast of China, characterized by a high intake of vegetables, fruits, aquatic products, soy products, and dairy products, has recently been highlighted as a potential model for healthful eating across China.<sup>5,10</sup> However, this dietary pattern has not yet been identified and lacks empirical evidences for its purported health benefits.

Thus, in this study, our first objective is to apply an unsupervised clustering analysis to dietary data from a large population-based cohort in Hangzhou, located within the Yangtze River Delta in eastern China, to identify and define a healthy

dietary pattern specific to this region. Our secondary objective is to develop a dietary index based on this pattern and assess its associations with adiposity, cardiometabolic diseases and gut microbiota. Our final objective is to extrapolated this dietary index to a nationwide representative cohort and investigate its association with all-cause mortality.

## **Methods**

### **Study Population**

The present study employed the WELL-China cohort, a population-based prospective cohort, which enrolled 10,268 residents aged 18-80 years from three districts of Hangzhou, Zhejiang Province, China, between 2016 to 2019.<sup>11</sup> We excluded participants with incomplete or illogical food frequency questionnaire (FFQ), those with self-reported cancer and/or gastrointestinal disease, and those with implausible energy intake (<800 or >4,000 kcal/day for males, <500 or >3,500 kcal/day for female). This resulted in 8,852 eligible participants for analysis. Additionally, participants without fecal samples were excluded, leaving 6,193 participants for gut microbial analysis. The flowchart of study selection is presented in **Figure S1**. The WELL-China study was approved by the Institutional Review Boards of Zhejiang University, Hangzhou, China, and Stanford University, CA, USA. Written informed consent was obtained from all participants.

### **Dietary Assessment and Measurement of Other Variables**

Dietary information was assessed using a validated semi-quantitative FFQ comprising 26 commonly consumed food items in China.<sup>11</sup> Participants reported the frequency and average amount of each food/beverage consumed over the past 12 months. Detailed descriptions of the FFQ have been published elsewhere.<sup>12</sup> Referring to prior studies, nutritional data were presented as the energy contribution of each food item in this study.<sup>12, 13</sup>

Participant characteristics were collected through structured questionnaires in face-to-face interviews. Educational status was categorized into three levels: elementary (illiterate and primary school), secondary (junior high school, high school, and professional college), and higher (university and beyond). Alcohol consumption was categorized as non-drinkers and current drinkers. Smoking status was categorized as non-smoker, former smoker, and current smoker. Physical activity was evaluated using the International Physical Activity Questionnaire-Short Form and classified into low, moderate, and high levels.<sup>14</sup> Antibiotic use was defined as described according to previous study.<sup>15</sup> Medication use was defined as self-reported use of hypertension, dyslipidemia, and/or type 2 diabetes medications.

Fasting venous blood samples (12 hours) were collected on the same day as the questionnaires, processed, and stored at -80°C. They were then tested to assess fasting blood glucose, triglycerides, and other indicators.

### **Identification of Dietary Patterns**

We derived the dietary patterns using the unsupervised K-means clustering analysis on standardized dietary intake data (percentage of energy contribution of each food item). The optimal number of clusters was determined using the *NbClust* function. We grouped the 26 food items obtained from the FFQ into 17 food groups based on similarities in nutrient sources or habitual practices.

### **Development of the Eastern Diet Index**



After identifying one dietary pattern (Pattern 1) as the Eastern Diet (EastDiet) from the cluster analysis, we developed the EastDiet index to assess adherence to the EastDiet. We created the EastDiet index by selecting 9 healthy food groups significantly higher in Pattern 1, including vegetables, fruits, soy products, aquatic products, dairy products, whole grains, nuts, tubers and roots, and eggs, and three unhealthy food groups significantly lower in Pattern 1, including refined grains, red and processed meat, and deep fried foods (**Figure 1**). Food groups that were inconsistent with health outcomes in previous studies were not included<sup>13</sup>.

Participants whose energy contribution of each healthy food component was below the median received a value of 0, and those above the median received a value of 1<sup>16</sup>. Conversely, for unhealthy food components, those below the median received a value of 1, and those above received a value of 0. Thus, the EastDiet index ranged from 0 (minimal adherence) to 12 (maximum adherence). The index was divided into three groups: low adherence (0-4), medium adherence (5-7), and high adherence (8-12).

### **Measurement of Adiposity-related Phenotypes**

Detailed information for measuring weight, height, waist, and hip circumference has been previously described<sup>17</sup>. Body mass index (BMI) was calculated as weight in kilograms divided by the square of height in meters. Waist to hip ratio (WHR) was calculated as waist circumference divided by hip circumference. Dual-energy x-ray absorptiometry (DXA) was used to measure fat mass in the whole body, trunk, android, gynoid, and leg regions.<sup>18</sup> Body fat percentage (BFP) was calculated as

whole body fat mass divided by weight. Trunk fat mass percentage (TFP), android fat mass percentage (AFP), gynoid fat mass percentage (GFP), and leg fat mass percentage (LFP) were calculated as a percentage of whole body fat mass. Android to gynoid fat ratio (AOI) was calculated as AFP divided by GFP.

### **Follow-up for Cardiometabolic Diseases**

Incident cases of cardiometabolic diseases, including type 2 diabetes and cardiovascular diseases (ischemic heart disease and stroke),<sup>19</sup> were tracked through electronic links to established death and disease registries with unique personal identification numbers. Incident cases were ascertained using The International Classification of Diseases, Tenth Revision (ICD-10): Type 2 diabetes (E11/E14/O24), ischemic heart disease (I20-I25), and stroke (I60-I63). Patients were followed from baseline until the onset of diseases or the end of the study period (October 28, 2022), whichever came first. Participants with a history of type 2 diabetes, ischemic heart disease, and stroke at baseline were excluded from cardiometabolic diseases analysis.

### **Gut Microbiota Profiling**

During the in-person interview, participants were asked to collect fecal samples, which were then store in -80°C freezers. The V3-V4 region of the 16S rRNA gene was sequenced using the Illumina HiSeq PE-250 platform (Illumina Inc. USA). Detailed information on DNA extraction and paired-end 16rRNA gene sequencing were described previously. Taxonomic profiles were created using QIIME2.<sup>20</sup> Pair-end

reads were assembled using the qiime tools import command. The DADA2 pipeline was used to filter low-quality regions of the sequences, marker gene Illumina sequences, and chimeric sequences. Reads were then summarized to amplicon sequence variants (ASV) in a feature table and annotated using the Naïve Bayes classifier trained on the Sliva\_132 99% OTUs reference databases.

### **Extrapolation of the EastDiet Index**

To assess the reproducibility of the EastDiet index, we utilized data from the Chinese Longitudinal Healthy Longevity Survey (CLHLS), a community-based prospective cohort study initiated in 1998 among older adults in China.<sup>21</sup> This study features a nationally representative sample recruited from 23 provinces across China. For our analysis, we used data from the 2008 wave as a baseline, followed up in the 2011, 2014, and 2018 cycles. After applying exclusion criteria, a total of 13,773 participants were included in the analysis (**Figure S2**). Detailed descriptions can be found in the Supplementary Methods section of the Supplementary Material<sup>21-23</sup>.

### **Statistical Analysis**

Data were presented as mean (SD) for continuous variables and percentages for categorical variables. In the WELL-China cohort, unsupervised K-means clustering analysis was used to determine dietary patterns. Cross-sectional associations of the EastDiet index with body fat and fat distribution traits were investigated using linear regression, adjusting for age, gender, smoking, alcohol, education, physical activity,

and total energy intake. Hazard ratios (HRs) and 95% confidence intervals (CIs) were calculated to explore prospective associations of the EastDiet index with incident cardiometabolic diseases, type 2 diabetes, and cardiovascular diseases using the Cox proportional regression, adjusting for the aforementioned covariates and BMI.

In gut microbiota analysis, linear regression models were applied to investigate the associations between the EastDiet index and microbial alpha-diversity (at the ASV level), adjusting for age, gender, BMI, smoking, alcohol, education status, physical activity, total energy intake, medication use, and antibiotic use. Alpha-diversity indices were transformed into Z-scores for analysis. To determine taxonomy variation, beta-diversity was calculated based on genus-level Bray-Curtis dissimilarity. Permutational multivariate analysis of variance (PERMANOVA) was used to investigate microbial community structure across EastDiet adherence levels using the Adonis function with 999 permutations.

For per-taxonomic feature tests, taxa with a prevalence below 10% and a relative abundance below 0.01% were filtered out. The relative abundance of the taxa was transformed using rank-based inverse normal transformation for downstream analysis. MaAsLin 2 was used to explore genera associated with high EastDiet adherence, adjusted for the aforementioned covariates. High-dimensional tests corrected the false discovery rate (FDR) using the Benjamini-Hochberg method with a target FDR of 0.05 considered significant for per-genus tests. To determine whether identified taxonomic features were beneficial to human health, Spearman correlation was used to quantify associations between identified genera and metabolic risk factors, with

significance set at 0.05 after the Benjamini-Hochberg correction.

To assess the reproducibility of the EastDiet index, we extrapolated the EastDiet index to the CLHLS, by recalculating the index based on 9 food components. Hazard ratios (HRs) and 95% confidence intervals (CIs) were calculated to explore prospective associations of the EastDiet index with all-cause mortality using the Cox proportional regression, adjusting for the age, gender, residence, geographic regions, BMI, education, smoking, alcohol, physical activity, and history of cardiometabolic diseases.

All statistical analyses were performed using Stata 15.0 (Stata Corp) and R version 4.2.2. Statistical significance was set at  $P < 0.05$  (two-tailed).

## Results

### Identification of Dietary Patterns

Among the 8,852 participants from the WELL-China cohort, two distinct dietary patterns were identified (the optimal number was 2) (**Table 1**). Pattern 1, observed in 48.2% of participants, closely mirrored healthy eating patterns popular for residents in the Yangtze River Delta of eastern China as outlined in the 2022 Dietary Guidelines for Chinese.<sup>10</sup> This pattern was characterized by high consumption of vegetables, fruits, soy products, aquatic products, and dairy (**Figure 1**). Additionally, Pattern 1 captured another 7 recognized characteristics of healthy eating behaviors, including high consumption of whole grains, tubers and roots, eggs, and nuts, alongside low consumption of refined grains, red and processed meat, and deep-fried foods. Nutrient analysis revealed that Pattern 1 had higher protein, fat, and fiber content but lower carbohydrate compared to Pattern 2. Health metrics analysis showed that Pattern 1 had lower BMI, BFP, AFP, WHR, and AOI, and higher LFP and GFP (**Table S1**). Based on these findings, Pattern 1 was designated as the “Eastern Diet” (EastDiet).

### EastDiet Index and Participant Characteristics

**Table 2** presents the participants characteristics categorized by EastDiet index levels in the WELL-China. High adherence was associated with older age, female gender, non-smoking, non-alcohol drinking, medication users, lower BMI, higher education, and greater physical activity. In the CLHLS, participants with high adherence had similar characteristics to those in the WELL-China, such as older age and more

female gender (**Table S2**).

In the WELL-China, validation comparing participants born in the Yangtze River Delta with those born in other regions of China demonstrated significantly higher EastDiet index scores (**Figure S3**). In the CLHLS, further comparing participants from the Yangtze River Delta compared with those from other regions of China also showed significantly higher EastDiet index, which demonstrated the robustness of the EastDiet (**Figure S4**).

### **EastDiet Adherence and Adiposity, Incident Cardiometabolic Diseases, Mortality**

In the WELL-China, multivariable cross-sectional analyses indicated that high adherence to EastDiet was significantly associated with lower measures of total fat (BMI and BFP) and central fat distribution (WHR, AOI, TFP, and AFP), as well as higher GFP, compared to low adherence (all  $P < 0.05$ ) (**Table 3**). High EastDiet adherence was also significantly associated with lower blood pressure, fasting blood glucose and triglycerides levels (all  $P < 0.05$ ) (**Supplementary Table 3**).

Over a median follow-up of 4.6 years, 192 cases of cardiometabolic diseases were recorded. After multivariable adjustment, high EastDiet adherence was significantly associated with a reduced incidence of overall cardiometabolic diseases (**Table 4**). HRs (95% CIs) were 0.65 (0.43, 0.97) for the highest vs lowest EastDiet index categories and 0.93 (0.87, 0.99) per 1-point increment in the index. Regarding specific diseases, high EastDiet adherence was significantly associated with a 42% reduced incidence of type 2 diabetes. No statistically significant associations were

found between the EastDiet index and cardiovascular diseases.

In the CLHLS, during the follow-up period from 2008 to 2018, a total of 9,506 (69.02%) deaths were documented. After multivariable adjustment, high EastDiet adherence was significantly associated with a reduced risk of all-cause mortality (**Table 4**). HRs (95% CIs) were 0.90 (0.85, 0.96) for the highest vs lowest EastDiet index categories and 0.96 (0.93, 0.98) per 1-point increment in the index.

### **EastDiet Adherence and Gut Microbiota**

In the WELL-China, multivariable analyses of microbial alpha-diversity indicated that high EastDiet adherence was associated with significantly higher Shannon ( $P$ -trend = 0.039) and Pielou's evenness ( $P$ -trend = 0.046) indices compared to low adherence (**Figure 2A**). Beta-diversity analyses showed significant differences in gut microbial community structure across EastDiet adherence levels ( $P < 0.001$ ) (**Figure 2B**). The EastDiet index explained a substantial proportion of the overall gut microbiota structural variations (Adonis  $R^2 = 0.21\%$ ).

Using MaAsLin 2, we identified 32 significant genus-level taxa associated with high EastDiet adherence (FDR < 0.05) (**Figure 2C**). Among these, 12 genera belonged to the *Lachnospiraceae* family. Genera enriched in participants with high EastDiet adherence were predominantly associated with lower BMI, central fat distribution (WHR, TFP, AFP, and AOI), blood pressure, fasting glucose, and triglyceride levels (FDR < 0.05) (**Figure 2D**). Conversely, genera depleted in participants with high EastDiet adherence showed positive associations with these



metabolic risk factors. These findings suggest that taxa associated with high EastDiet

adherence may confer metabolic health benefits.

## Discussion

In this large-scale, population-based cohort study, we utilized unsupervised clustering to identify and characterize a health-oriented dietary pattern prevalent in the Yangtze River Delta of eastern China, termed it "Eastern Diet" (EastDiet). This pattern is distinguished by its high consumption of plant-based foods and relatively low intake of carbohydrates. For the first time, we defined the components of the EastDiet and developed the EastDiet index. Our analysis revealed that high EastDiet adherence was associated with lower total fat and central fat content in cross-sectional analyses and a reduced risk of developing cardiometabolic diseases in prospective analyses. We also observed favorable associations between EastDiet adherence and gut microbial diversity and taxonomy. Furthermore, applying the EastDiet index to a nationwide cohort of elderly Chinese demonstrated a protective association between the EastDiet and mortality.

China accounts for one-fifths of the global population; however, it lacks a dietary pattern that aligns with its cultural context. Dietary patterns vary dramatically across countries, and generalizing dietary patterns identified in other countries to China is inappropriate.<sup>24</sup> Considering the current high and rising incidence of obesity and cardiometabolic diseases in China,<sup>25-27</sup> identifying a healthy diet pattern that can be generalized throughout China could serve as a crucial health promotion strategy.

The 2022 Dietary Guidelines for Chinese recommended a prototype healthy diet from China's eastern coastal regions, characterized by high consumption of vegetables, fruits, aquatic products, soy products, and dairy products.<sup>10</sup> However, this

recommendation was conceptual and lacked empirical support. This is the first study to empirically define the EastDiet and develop a corresponding index. Utilizing unsupervised clustering, our study not only confirms the consumption of these food groups but also identifies additional healthy eating features within the EastDiet, distinguishing it from traditional Chinese diets known for their high glycemic index.<sup>28</sup> For instance, our findings revealed a low intake of deep-fried foods and refined grains, but a high consumption of whole grains and tubers, aligning with some aspects of the Mediterranean diet while emphasizing local dietary practices like increased soy and freshwater product intake.<sup>5, 16</sup>

We developed the EastDiet index to comprehensively measure dietary quality and composition and generalized it to a nationwide database. This index helps assess adherence to the EastDiet and explore its associations with health outcomes. It can also serve as a useful tool in public health campaigns and interventions aimed at improving diet quality not only in eastern China but also nationwide.

Several healthy eating patterns have been proposed in China based on the Dietary Guidelines for Chinese and the Chinese Diet Pagoda.<sup>13, 29, 30</sup> Dissimilarly, the EastDiet is derived from the actual dietary patterns of residents in eastern China. Our data demonstrated that a large proportion of the study population, especially older individuals, already adhered to the EastDiet pattern. We also successfully extrapolated the EastDiet to a nationwide representative dataset and found a trend toward older age in high adherence to the EastDiet. As to China's population ages rapidly, improving diet quality is particularly important to achieve healthy ageing.<sup>31</sup> Thus, our findings

have the potential to be generalized to the national population as a dietary approach to improve metabolic health and reduce mortality risk, especially among older adults.

Diet is a key factor in obesity development and high-calorie, poor-quality dietary patterns significantly contribute to weight gain.<sup>32</sup> Our data showed an inverse association between EastDiet adherence and whole body fat (BMI and body fat percentage). In line with our findings, a randomized controlled trial of a diet based on Eastern Chinese-style cuisine found that it could achieve weight loss over six months in Chinese adults with pre-diabetes.<sup>33</sup> In addition to total fatness, we also found an inverse association between EastDiet index and lower central fat distribution (e.g., WHR and AOI). Given that Chinese people tend to develop more trunk fat for a given BMI compared to non-Hispanic Whites,<sup>34</sup> our findings provide evidence on strategies to target abdominal fat accumulation for Chinese people.

The shift in diet pattern in China has led to an increase in type 2 diabetes prevalence.<sup>35</sup> Key dietary risk factors fueling this rise include low consumption of whole grains, high intake of refined grains, and insufficient intake of seafood, vegetables, fruits, nuts, and dairy.<sup>35</sup> The EastDiet addresses these risk factors, showing a potential relationship between adherence to the EastDiet and a reduced risk of new-onset cardiometabolic disease and type 2 diabetes. This relationship mirrors the protective effects of Mediterranean and plant-based diets against type 2 diabetes,<sup>36, 37</sup> supported by the beneficial role of dietary fiber and antioxidants found in plant-based foods in enhancing glycemic control and insulin sensitivity.<sup>36, 38</sup>

We indicated that high EastDiet adherence promotes the development of

beneficial gut microbiota, playing a pivotal role in disease prevention. The influence of dietary patterns on gut microbiota composition is well-documented, and recent studies has underscore the importance of gut microbiota as a marker of dietary quality.<sup>39</sup> We observed that the EastDiet enhanced microbial alpha-diversity, aligning with previous research linking high diet quality to high microbial diversity.<sup>40, 41</sup> Moreover, the EastDiet significantly influenced microbial structure variation, similar to the effect observed with the Mediterranean diet.<sup>16</sup>

We identified 32 gut bacterial genera associated with the EastDiet index. Many of them are from the *Lachnospiraceae* family, known for their role in fiber fermentation and butyrate production, which promote intestinal homeostasis.<sup>42, 43</sup> In this study, the abundance of *Lachnospiraceae*-related genera exhibited beneficial associations with health risk factors such as BMI, central fat content, blood pressure, glucose, and triglyceride levels, suggesting a plausible mediating role of gut microbiota.

Our study has several notable strengths. Firstly, we utilized unsupervised clustering to characterize the EastDiet from the Yangtze River Delta in Eastern China. The pattern determined through these steps is more realistic and reliable because it is not assessed by simply picking out several food items without quantitative evidence. Secondly, we extrapolated the EastDiet index to a nationwide representative dataset to demonstrate the robustness of the EastDiet. Thirdly, we used both cross-sectional and prospective designs to assess the associations between EastDiet and health outcomes. Fourthly, we employed a large-sample gut microbiota data to investigate the

associations among EastDiet, gut microbiota, and metabolic risks, providing an in-depth understanding of the EastDiet.

However, our study has several limitations. The lack of repeated dietary assessments is a notable constraint. Additionally, while the food frequency questionnaire used in the WELL-China has undergone validation, it may not capture all aspects of daily energy intake and lacks investigation of condiment use. Furthermore, in the CLHLS, dietary information was collected using non-quantitative dietary questionnaires, and several food groups identified in the WELL-China, including whole grains, tubers and roots, and deep-fried foods, were missing, which limited the ability to assess the EastDiet index.

## **Conclusion**

This study identifies the Eastern Diet, a healthful dietary pattern from Eastern China. Our findings underscore the importance of the Eastern Diet, which not only aligns with regional culinary preferences and mitigates cardiometabolic risks but also has protective effects on mortality in a large nationwide dataset. The Eastern Diet highlights its potential to serve as a local reference for daily healthy eating for Chinese people, similar to the Mediterranean diet for Western populations.

## **Acknowledgements**

YWS, WH, and SKZ designed the study and were responsible for the manuscript.

YWS analyzed data. YWS, JTK, XML, YJ, YFH, QYW, JD, WH, and SKZ wrote the manuscript and created the tables and figures. SKZ supervised the study. All authors contributed to the critical revision of the manuscript for intellectual content. All authors read and revised the manuscript, and approved the final submitted version.

## **Source of Funding**

This work was funded by the Amway (China) Fund [519600-I 5210H]; the Nutrilite Health Institute Wellness Fund; the China Medical Board (CMB) [15-216]; the Cyrus Tang Foundation; and the Hsun K. Chou Fund of Zhejiang University Education Foundation [419600-11107].

## **Disclosures**

None.

## References

1. Hu FB. Dietary pattern analysis: a new direction in nutritional epidemiology. *Curr Opin Lipidol.* 2002;13:3-9.
2. Shan Z, Li Y, Baden MY, Bhupathiraju SN, Wang DD, Sun Q, Rexrode KM, Rimm EB, Qi L, Willett WC, Manson JE, Qi Q and Hu FB. Association Between Healthy Eating Patterns and Risk of Cardiovascular Disease. *JAMA Intern Med.* 2020;180:1090-1100.
3. Li J, Guasch-Ferre M, Chung W, Ruiz-Canela M, Toledo E, Corella D, Bhupathiraju SN, Tobias DK, Tabung FK, Hu J, Zhao T, Turman C, Feng YA, Clish CB, Mucci L, Eliassen AH, Costenbader KH, Karlson EW, Wolpin BM, Ascherio A, Rimm EB, Manson JE, Qi L, Martinez-Gonzalez MA, Salas-Salvado J, Hu FB and Liang L. The Mediterranean diet, plasma metabolome, and cardiovascular disease risk. *Eur Heart J.* 2020;41:2645-2656.
4. Lam HM, Remais J, Fung MC, Xu L and Sun SS. Food supply and food safety issues in China. *Lancet.* 2013;381:2044-53.
5. Wang J, Lin X, Bloomgarden ZT and Ning G. The Jiangnan diet, a healthy diet pattern for Chinese. *J Diabetes.* 2020;12:365-371.
6. Zhou J, Leepromrath S and Zhou D. Dietary diversity indices v. dietary guideline-based indices and their associations with non-communicable diseases, overweight and energy intake: evidence from China. *Public Health Nutr.* 2023;26:911-933.
7. Li X, Wu C, Lu J, Chen B, Li Y, Yang Y, Hu S and Li J. Cardiovascular risk factors in China: a nationwide population-based cohort study. *Lancet Public Health.* 2020;5:e672-e681.
8. Zhou M, Wang H, Zeng X, Yin P, Zhu J, Chen W, Li X, Wang L, Wang L, Liu Y, Liu J, Zhang M, Qi J, Yu S, Afshin A, Gakidou E, Glenn S, Krish VS, Miller-Petrie MK, Mountjoy-Venning WC, Mullany EC, Redford SB, Liu H, Naghavi M, Hay SI, Wang L, Murray CJL and Liang X. Mortality, morbidity, and risk factors in China and its provinces, 1990-2017: a systematic analysis for the Global Burden of Disease Study 2017. *Lancet.* 2019;394:1145-1158.
9. Yu E, Malik VS and Hu FB. Cardiovascular Disease Prevention by Diet Modification: JACC Health Promotion Series. *J Am Coll Cardiol.* 2018;72:914-926.
10. Nutrition CSO. *Dietary Guideline for Chinese.* Beijing, China: People's Medical Publishing House; 2022.
11. Min Y, Zhao X, Stafford RS, Ma X, Chen SH, Gan D, Wei C, Huang C, Chen L, Gao P, Yang F, Winter SJ, Wu YH, Heaney CA, Baiocchi M, Ioannidis JPA, Hsing AW and Zhu S. Cohort Profile: WELL Living Laboratory in China (WELL-China). *Int J Epidemiol.* 2021;50:1432-1443.
12. Ru Y, Wang N, Min Y, Wang X, McGurie V, Duan M, Xu X, Zhao X, Wu YH, Lu Y, Hsing AW and Zhu S. Characterization of dietary patterns and assessment of their relationships with metabolomic profiles: A community-based study. *Clin Nutr.* 2021;40:3531-3541.
13. Yuan YQ, Li F, Dong RH, Chen JS, He GS, Li SG and Chen B. The Development



- of a Chinese Healthy Eating Index and Its Application in the General Population. *Nutrients*. 2017;9.
14. Craig CL, Marshall AL, Sjoström M, Bauman AE, Booth ML, Ainsworth BE, Pratt M, Ekelund U, Yngve A, Sallis JF and Oja P. International physical activity questionnaire: 12-country reliability and validity. *Med Sci Sports Exerc*. 2003;35:1381-95.
  15. Min Y, Ma X, Sankaran K, Ru Y, Chen L, Baiocchi M and Zhu S. Sex-specific association between gut microbiome and fat distribution. *Nat Commun*. 2019;10:2408.
  16. Wang DD, Nguyen LH, Li Y, Yan Y, Ma W, Rinott E, Ivey KL, Shai I, Willett WC, Hu FB, Rimm EB, Stampfer MJ, Chan AT and Huttenhower C. The gut microbiome modulates the protective association between a Mediterranean diet and cardiometabolic disease risk. *Nat Med*. 2021;27:333-343.
  17. Han S, Gan D, Wang G, Ru Y, Huang C, Lin J, Zhang L, Meng Z and Zhu S. Associations of Platelet Indices with Body Fat Mass and Fat Distribution. *Obesity (Silver Spring)*. 2018;26:1637-1643.
  18. Gao P, Gan D, Li S, Kang Q, Wang X, Zheng W, Xu X, Zhao X, He W, Wu J, Lu Y, Hsing AW and Zhu S. Cross-sectional and longitudinal associations between body flexibility and sarcopenia. *J Cachexia Sarcopenia Muscle*. 2023;14:534-544.
  19. Han Y, Hu Y, Yu C, Guo Y, Pei P, Yang L, Chen Y, Du H, Sun D, Pang Y, Chen N, Clarke R, Chen J, Chen Z, Li L, Lv J and China Kadoorie Biobank Collaborative G. Lifestyle, cardiometabolic disease, and multimorbidity in a prospective Chinese study. *Eur Heart J*. 2021;42:3374-3384.
  20. Bolyen E, Rideout JR, Dillon MR, Bokulich NA, Abnet CC, Al-Ghalith GA, Alexander H, Alm EJ, Arumugam M, Asnicar F, Bai Y, Bisanz JE, Bittinger K, Brejnrod A, Brislawn CJ, Brown CT, Callahan BJ, Caraballo-Rodriguez AM, Chase J, Cope EK, Da Silva R, Diener C, Dorrestein PC, Douglas GM, Durall DM, Duvall C, Edwards CF, Ernst M, Estaki M, Fouquier J, Gauglitz JM, Gibbons SM, Gibson DL, Gonzalez A, Gorlick K, Guo J, Hillmann B, Holmes S, Holste H, Huttenhower C, Huttley GA, Janssen S, Jarmusch AK, Jiang L, Kaehler BD, Kang KB, Keefe CR, Keim P, Kelley ST, Knights D, Koester I, Kosciulek T, Kreps J, Langille MGI, Lee J, Ley R, Liu YX, Loftfield E, Lozupone C, Maher M, Marotz C, Martin BD, McDonald D, McIver LJ, Melnik AV, Metcalf JL, Morgan SC, Morton JT, Naimey AT, Navas-Molina JA, Nothias LF, Orchanian SB, Pearson T, Peoples SL, Petras D, Preuss ML, Pruesse E, Rasmussen LB, Rivers A, Robeson MS, 2nd, Rosenthal P, Segata N, Shaffer M, Shiffer A, Sinha R, Song SJ, Spear JR, Swafford AD, Thompson LR, Torres PJ, Trinh P, Tripathi A, Turnbaugh PJ, Ul-Hasan S, van der Hoof JJJ, Vargas F, Vazquez-Baeza Y, Vogtmann E, von Hippel M, Walters W, Wan Y, Wang M, Warren J, Weber KC, Williamson CHD, Willis AD, Xu ZZ, Zaneveld JR, Zhang Y, Zhu Q, Knight R and Caporaso JG. Reproducible, interactive, scalable and extensible microbiome data science using QIIME 2. *Nat Biotechnol*. 2019;37:852-857.
  21. Zeng Y, Feng Q, Hesketh T, Christensen K and Vaupel JW. Survival, disabilities in activities of daily living, and physical and cognitive functioning among the oldest-old in China: a cohort study. *Lancet*. 2017;389:1619-1629.
  22. Zhao W, Hasegawa K and Chen J. The use of food-frequency questionnaires for

various purposes in China. *Public Health Nutr.* 2002;5:829-33.

23. Chen H, Shen J, Xuan J, Zhu A, Ji JS, Liu X, Cao Y, Zong G, Zeng Y, Wang X and Yuan C. Plant-based dietary patterns in relation to mortality among older adults in China. *Nat Aging.* 2022;2:224-230.

24. Xu X, Hall J, Byles J and Shi Z. Dietary Pattern Is Associated with Obesity in Older People in China: Data from China Health and Nutrition Survey (CHNS). *Nutrients.* 2015;7:8170-88.

25. Liu S, Li Y, Zeng X, Wang H, Yin P, Wang L, Liu Y, Liu J, Qi J, Ran S, Yang S and Zhou M. Burden of Cardiovascular Diseases in China, 1990-2016: Findings From the 2016 Global Burden of Disease Study. *JAMA Cardiol.* 2019;4:342-352.

26. Wang L, Zhou B, Zhao Z, Yang L, Zhang M, Jiang Y, Li Y, Zhou M, Wang L, Huang Z, Zhang X, Zhao L, Yu D, Li C, Ezzati M, Chen Z, Wu J, Ding G and Li X. Body-mass index and obesity in urban and rural China: findings from consecutive nationally representative surveys during 2004-18. *Lancet.* 2021;398:53-63.

27. Yan Y, Wu T, Zhang M, Li C, Liu Q and Li F. Prevalence, awareness and control of type 2 diabetes mellitus and risk factors in Chinese elderly population. *BMC Public Health.* 2022;22:1382.

28. Miller V, Jenkins DA, Dehghan M, Srichaikul K, Rangarajan S, Mente A, Mohan V, Swaminathan S, Ismail R, Luz Diaz M, Ravindran RM, Zatonska K, Bahonar A, Altuntas Y, Khatib R, Lopez-Jaramillo P, Yusufali A, Yeates K, Chifamba J, Iqbal R, Yusuf R, Catherina Swart E, Bo H, Han G, Li X, Alhabib KF, Rosengren A, Avezum A, Lanas F, Yusuf S, Prospective U and Rural Epidemiology study i. Associations of the glycaemic index and the glycaemic load with risk of type 2 diabetes in 127 594 people from 20 countries (PURE): a prospective cohort study. *Lancet Diabetes Endocrinol.* 2024;12:330-338.

29. Xu X, Hall J, Byles J and Shi Z. Do older Chinese people's diets meet the Chinese Food Pagoda guidelines? Results from the China Health and Nutrition Survey 2009. *Public Health Nutr.* 2015;18:3020-30.

30. Xu X, Hall J, Byles J and Shi Z. Assessing dietary quality of older Chinese people using the Chinese Diet Balance Index (DBI). *PLoS One.* 2015;10:e0121618.

31. Chen X, Giles J, Yao Y, Yip W, Meng Q, Berkman L, Chen H, Chen X, Feng J, Feng Z, Glinskaya E, Gong J, Hu P, Kan H, Lei X, Liu X, Steptoe A, Wang G, Wang H, Wang H, Wang X, Wang Y, Yang L, Zhang L, Zhang Q, Wu J, Wu Z, Strauss J, Smith J and Zhao Y. The path to healthy ageing in China: a Peking University-Lancet Commission. *Lancet.* 2022;400:1967-2006.

32. Chao AM, Quigley KM and Wadden TA. Dietary interventions for obesity: clinical and mechanistic findings. *J Clin Invest.* 2021;131.

33. Luo Y, Wang J, Sun L, Gu W, Zong G, Song B, Shen C, Zhou P, Chen Y, Wu Y, Lin H, Zheng H, Ni M, Yang X, Chen Y, Xu X, Zhang J, Shi J, Zhang R, Hu J, Hou H, Lu L, Xu X, Liang L, Liu R, Liu X, Li H, Hong J, Wang W, Lin X and Ning G. Isocaloric-restricted Mediterranean Diet and Chinese Diets High or Low in Plants in Adults With Prediabetes. *J Clin Endocrinol Metab.* 2022;107:2216-2227.

34. He W, Zhang S, Song A, Yang M, Jiao J, Allison DB, Heymsfield SB and Zhu S. Greater abdominal fat accumulation is associated with higher metabolic risk in

- Chinese than in white people: an ethnicity study. *PLoS One*. 2013;8:e58688.
35. Wei W, Jiang W, Han T, Tian M, Ding G, Li Y and Sun C. The future of prevention and treatment of diabetes with nutrition in China. *Cell Metab*. 2021;33:1908-1910.
36. Satija A, Bhupathiraju SN, Rimm EB, Spiegelman D, Chiuve SE, Borgi L, Willett WC, Manson JE, Sun Q and Hu FB. Plant-Based Dietary Patterns and Incidence of Type 2 Diabetes in US Men and Women: Results from Three Prospective Cohort Studies. *PLoS Med*. 2016;13:e1002039.
37. Sobiecki JG, Imamura F, Davis CR, Sharp SJ, Koulman A, Hodgson JM, Guevara M, Schulze MB, Zheng JS, Agnoli C, Bonet C, Colorado-Yohar SM, Fagherazzi G, Franks PW, Gundersen TE, Jannasch F, Kaaks R, Katzke V, Molina-Montes E, Nilsson PM, Palli D, Panico S, Papier K, Rolandsson O, Sacerdote C, Tjonneland A, Tong TYN, van der Schouw YT, Danesh J, Butterworth AS, Riboli E, Murphy KJ, Wareham NJ and Forouhi NG. A nutritional biomarker score of the Mediterranean diet and incident type 2 diabetes: Integrated analysis of data from the MedLey randomised controlled trial and the EPIC-InterAct case-cohort study. *PLoS Med*. 2023;20:e1004221.
38. Jenkins DJ, Kendall CW, Marchie A, Jenkins AL, Augustin LS, Ludwig DS, Barnard ND and Anderson JW. Type 2 diabetes and the vegetarian diet. *Am J Clin Nutr*. 2003;78:610S-616S.
39. Asnicar F, Berry SE, Valdes AM, Nguyen LH, Piccinno G, Drew DA, Leeming E, Gibson R, Le Roy C, Khatib HA, Francis L, Mazidi M, Mompeo O, Valles-Colomer M, Tett A, Beghini F, Dubois L, Bazzani D, Thomas AM, Mirzayi C, Khleborodova A, Oh S, Hine R, Bonnett C, Capdevila J, Danzanvilliers S, Giordano F, Geistlinger L, Waldron L, Davies R, Hadjigeorgiou G, Wolf J, Ordovas JM, Gardner C, Franks PW, Chan AT, Huttenhower C, Spector TD and Segata N. Microbiome connections with host metabolism and habitual diet from 1,098 deeply phenotyped individuals. *Nat Med*. 2021;27:321-332.
40. Miao Z, Du W, Xiao C, Su C, Gou W, Shen L, Zhang J, Fu Y, Jiang Z, Wang Z, Jia X, Zheng JS and Wang H. Gut microbiota signatures of long-term and short-term plant-based dietary pattern and cardiometabolic health: a prospective cohort study. *BMC Med*. 2022;20:204.
41. Yu D, Nguyen SM, Yang Y, Xu W, Cai H, Wu J, Cai Q, Long J, Zheng W and Shu XO. Long-term diet quality is associated with gut microbiome diversity and composition among urban Chinese adults. *Am J Clin Nutr*. 2021;113:684-694.
42. Louis P and Flint HJ. Diversity, metabolism and microbial ecology of butyrate-producing bacteria from the human large intestine. *FEMS Microbiol Lett*. 2009;294:1-8.
43. Vacca M, Celano G, Calabrese FM, Portincasa P, Gobbetti M and De Angelis M. The Controversial Role of Human Gut Lachnospiraceae. *Microorganisms*. 2020;8.

**Table 1 Comparison of Food Groups Between Two Dietary Patterns in the WELL-China Cohort**

| Food groups <sup>a</sup> | Pattern 1<br>(Eastern Diet) | Pattern 2   | P-value <sup>b</sup> |
|--------------------------|-----------------------------|-------------|----------------------|
| No. participants         | 4,270                       | 4,582       |                      |
| Vegetables               | 0.05 (0.03)                 | 0.03 (0.02) | <0.001               |
| Fruits                   | 0.05 (0.04)                 | 0.03 (0.02) | <0.001               |
| Aquatic products         | 0.04 (0.04)                 | 0.02 (0.02) | <0.001               |
| Soy products             | 0.04 (0.04)                 | 0.03 (0.03) | <0.001               |
| Dairy products           | 0.06 (0.06)                 | 0.02 (0.03) | <0.001               |
| Whole grains             | 0.09 (0.09)                 | 0.03 (0.04) | <0.001               |
| Tubers and roots         | 0.02 (0.02)                 | 0.01(0.01)  | <0.001               |
| Nuts                     | 0.08 (0.09)                 | 0.04 (0.05) | <0.001               |
| Eggs                     | 0.05 (0.02)                 | 0.03 (0.03) | <0.001               |
| Refined grains           | 0.32 (0.11)                 | 0.45 (0.15) | <0.001               |
| Deep-fried foods         | 0.01 (0.02)                 | 0.02 (0.04) | <0.001               |
| Red and processed meat   | 0.08 (0.06)                 | 0.11 (0.09) | <0.001               |
| Desserts                 | 0.04 (0.06)                 | 0.04 (0.06) | <0.001               |
| Stuffed foods            | 0.04 (0.04)                 | 0.04 (0.04) | <0.001               |
| Poultry                  | 0.03 (0.03)                 | 0.03 (0.03) | <0.001               |
| Soft beverage            | 0.003 (0.01)                | 0.01 (0.03) | <0.001               |
| Alcohol                  | 0.01 (0.04)                 | 0.07 (0.12) | <0.001               |

<sup>a</sup> Dietary data are presented as the average energy contribution of each food group.

<sup>b</sup> P-values were calculated using the Mann-Whitney U test.

**Table 2 Participant Characteristics by Eastern Diet Index Category in the WELL-China Cohort**

| Characteristics <sup>a</sup> | Low adherence   | Median adherence | High adherence  | P-value <sup>b</sup> |
|------------------------------|-----------------|------------------|-----------------|----------------------|
| Age (years)                  | 51.40(13.98)    | 54.17(13.22)     | 56.97(12.48)    | <0.001               |
| Female (%)                   | 1069(42.95)     | 2441(62.43)      | 1927(78.56)     | <0.001               |
| BMI (kg/m <sup>2</sup> )     | 23.96(3.45)     | 23.70(3.22)      | 23.40(3.01)     | <0.001               |
| Education level (%)          |                 |                  |                 | <0.001               |
| Elementary                   | 1424(57.21)     | 2086(53.35)      | 1119(45.62)     |                      |
| Secondary                    | 464(18.64)      | 896(22.92)       | 702(28.62)      |                      |
| Higher                       | 599(24.07)      | 924(23.63)       | 631(25.72)      |                      |
| Physical activity (%)        |                 |                  |                 | <0.001               |
| Low                          | 531(21.33)      | 638(16.32)       | 284(11.58)      |                      |
| Moderate                     | 1110(44.60)     | 1969(50.36)      | 1306(53.24)     |                      |
| High                         | 826(33.19)      | 1282(32.79)      | 856(34.90)      |                      |
| Smoking status (%)           |                 |                  |                 | <0.001               |
| Never                        | 1512(60.75)     | 2940(75.19)      | 2131(86.87)     |                      |
| Former                       | 204(8.20)       | 281(7.19)        | 137(5.58)       |                      |
| Current                      | 769(30.90)      | 684(17.49)       | 183(7.46)       |                      |
| Current drinkers (%)         |                 |                  |                 | <0.001               |
| Yes                          | 1329(52.39)     | 1692(43.27)      | 948(38.65)      |                      |
| No                           | 1160(46.61)     | 2218(56.73)      | 1505(61.35)     |                      |
| Total energy intake (kcal)   | 1389.35(557.20) | 1367.20(536.07)  | 1359.24(480.19) | 0.109                |
| Medication use (%)           | 580(23.30)      | 1024(26.19)      | 722(29.43)      | <0.001               |
| Antibiotic use (%)           | 413(16.60)      | 716(18.32)       | 457(18.67)      | 0.116                |

<sup>a</sup> Continuous variables are presented as mean (SD) and categorical variables are presented as n (%).

<sup>b</sup> P-values were calculated using one-way analysis of variance (ANOVA) for continuous variables and chi-square tests for categorical variables.

**Table 3 Cross-Sectional Association of the Eastern Diet Index with Adiposity in the WELL-China Cohort**

|                          | Low adherence | Median adherence    | High adherence     | Per index increment   | <i>P</i> -trend |
|--------------------------|---------------|---------------------|--------------------|-----------------------|-----------------|
| Body mass index          | 1.00          | -0.13(-0.30,0.03)   | -0.32(-0.51,-0.12) | -0.06(-0.09,-0.03)    | 0.001           |
| Body fat percentage      | 1.00          | -0.15(-0.46,0.15)   | -0.40(-0.75,-0.04) | -0.07(-0.13,-0.02)    | 0.029           |
| Waist-hip ratio          | 1.00          | -0.01(-0.01,-0.002) | -0.01(-0.02,-0.01) | -0.002(-0.003,-0.002) | <0.001          |
| Android-gynoid fat ratio | 1.00          | -0.01(-0.02,0.002)  | -0.02(-0.03,-0.01) | -0.004(-0.01,-0.002)  | <0.001          |
| Trunk fat percentage     | 1.00          | -0.09(-0.35,0.17)   | -0.32(-0.64,-0.02) | -0.07(-0.12,-0.02)    | 0.035           |
| Android fat percentage   | 1.00          | -0.06(-0.13,0.01)   | -0.14(-0.22,-0.06) | -0.03(-0.04,-0.02)    | 0.001           |
| Gynoid fat percentage    | 1.00          | 0.10(-0.04,0.24)    | 0.23(0.06,0.39)    | 0.04(0.02,0.07)       | 0.006           |
| Leg fat percentage       | 1.00          | 0.10(-0.15,0.35)    | 0.19(-0.10,0.48)   | 0.05(-0.001,0.10)     | 0.209           |

Betas (95% CI) of the EastDiet were estimated as continuous (per index increment) and categorical (three groups) variables with obesity and fat distribution indices. The regression linear models were adjusted for age, sex, education level, smoking status, alcohol consumption, physical activity, and total energy intake.

**Table 4 Prospective Associations of the Eastern Diet Index with Incident Cardiometabolic Diseases and All-cause Mortality**

|                          | Low adherence | Median adherence | High adherence  | Per index increment | P-trend |
|--------------------------|---------------|------------------|-----------------|---------------------|---------|
| <b>WELL-China cohort</b> |               |                  |                 |                     |         |
| Cardiometabolic diseases |               |                  |                 |                     |         |
| Cases/Total No.          | 70/2326       | 77/3588          | 45/2206         |                     |         |
| HR (95% CI)              | 1.00          | 0.69(0.50,0.97)  | 0.65(0.43,0.97) | 0.93(0.87,0.99)     | 0.027   |
| Type 2 diabetes          |               |                  |                 |                     |         |
| Cases/Total No.          | 53/2326       | 52/3588          | 30/2206         |                     |         |
| HR (95% CI)              | 1.00          | 0.63(0.36,0.96)  | 0.59(0.36,0.96) | 0.91(0.84,0.99)     | 0.022   |
| <b>CLHLS cohort</b>      |               |                  |                 |                     |         |
| All-cause mortality      |               |                  |                 |                     |         |
| Cases/Total No.          | 3317/4660     | 1783/6004        | 1968/3109       |                     |         |
| HR (95% CI)              | 1.00          | 0.99(0.95,1.04)  | 0.90(0.85,0.96) | 0.96(0.93,0.98)     | 0.002   |

HRs (95% CI) of the EastDiet were estimated as continuous (per index increment) and categorical (three groups) variables with cardiometabolic diseases. In the WELL, Cox proportional hazard models of HR (95% CI) were adjusted for age, sex, BMI, education level, smoking status, alcohol consumption, physical activity, and total energy intake. Participants with a history of type 2 diabetes and cardiovascular diseases (ischemic heart disease and stroke) at baseline were excluded from this analysis (n = 8,120). In the CLHLS, Cox proportional hazard models of HR (95% CI) were adjusted for age, sex, residence, geographic regions, BMI, education level, smoking status, alcohol consumption, physical activity, and history of cardiometabolic diseases.

## Figure Legend

### **Figure 1 Flowchart for Developing the Eastern Diet in the WELL-China Cohort.**

The radar map was created using standardized dietary data, showing the comparison of standardized mean values for 12 food groups between the two dietary patterns.

### **Figure 2 Associations of Eastern Diet Index with Gut Microbial Signatures in the WELL-China Cohort.**

A. Multivariable linear regression was used to estimate the associations of the EastDiet index with alpha-diversity metrics. B. A PERMANOVA test (999 permutations) was used to estimate the proportion of variation in gut taxonomy by the EastDiet. Principal coordinates analysis (PCoA) based on Bray-Curtis distance was used to estimate the dissimilarity of different levels of the EastDiet index. C. Multivariate Analysis by Linear (MaAsLin) was used to identify the associations of the EastDiet index with specific genera. Covariates included age, sex, BMI, education, smoking status, alcohol consumption, physical activity, total energy intake, medication use, and antibiotic use. D. Spearman correlation was used to estimate the associations of the EastDiet-related genera with obesity and other metabolic risk factors. The false discovery rate (FDR) was adjusted using the Benjamini-Hochberg method. A FDR < 0.05 was considered significant. All significant correlations are marked with an asterisk.



China

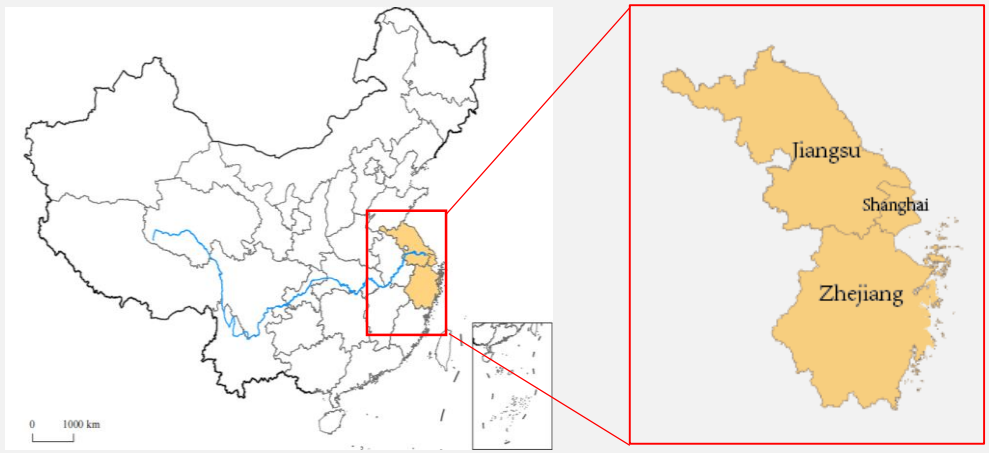

The Yangtze River Delta on the east coast of China

Dietary features of this region highlighted in the 2022 Dietary Guidelines for Chinese  
**High Intake of Vegetables, Fruits, Soy products, Aquatic products, and Dairy products**

Overlap

**Identical features: High Intake of Vegetables, Fruits, Soy products, Aquatic products, and Dairy products**

*Other healthy features: High Intake of Whole grains, Tubers and roots, Nuts, and Eggs*

*Low intake of Refined grains, Deep-fried foods, and Red and processed meat*

Features of Pattern 1 identified in the Well-China Cohort

WELL-China Cohort

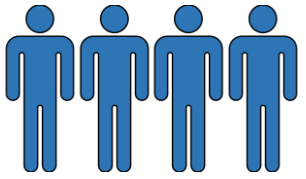

N = 8,852

- Vegetables
- Fruits
- Soy products
- Aquatic products
- Dairy products
- Whole grains
- Tubers and roots
- Nuts
- Eggs
- Refined grains
- Deep-fried foods
- Red/processed meat
- Dessert
- Stuffed foods
- Poultry
- Beverage
- Alcohol

Unsupervised K-means

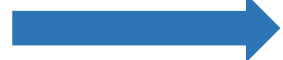

Optimal number of clusters is 2

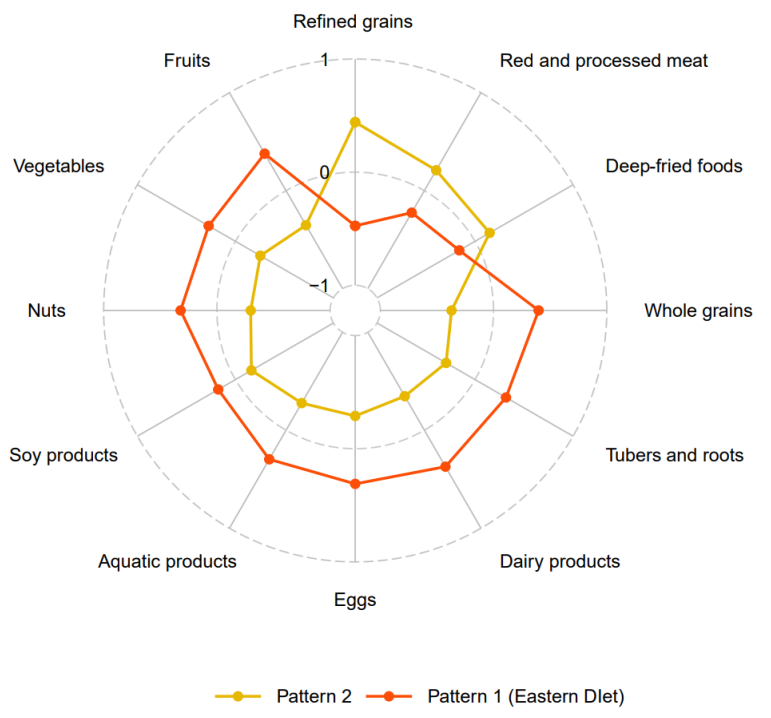

Pattern 1 is recognized as Eastern Diet

**A**

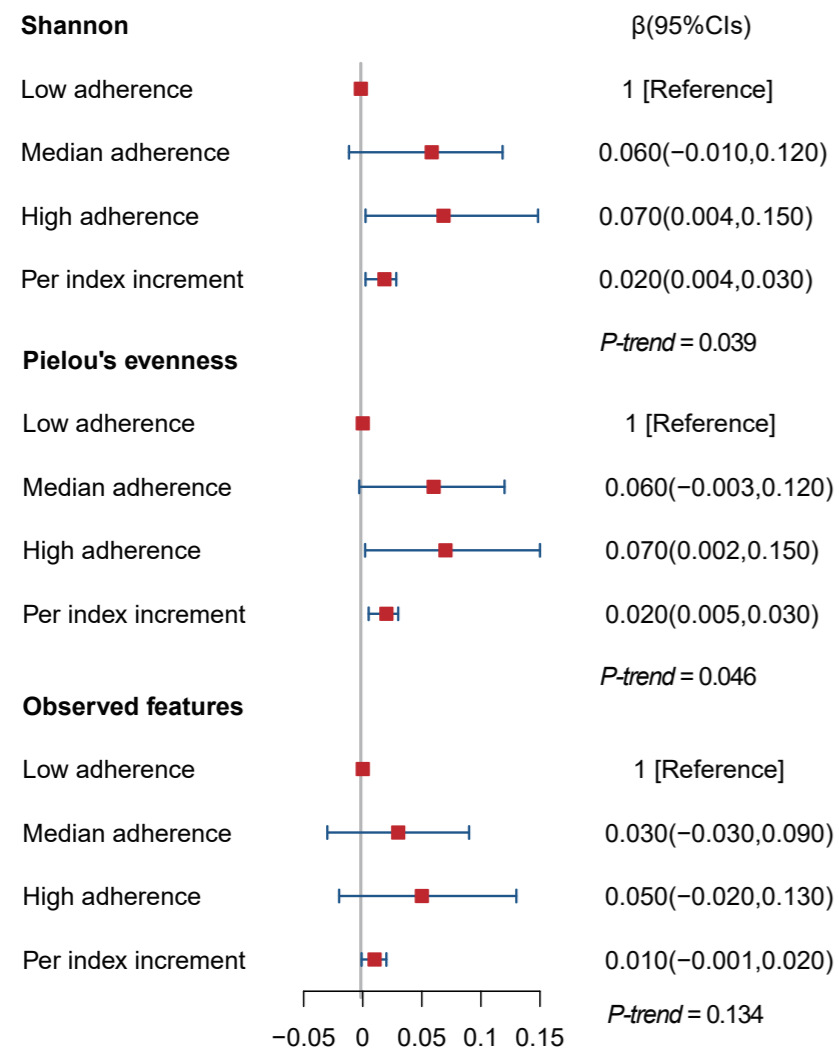

**B**

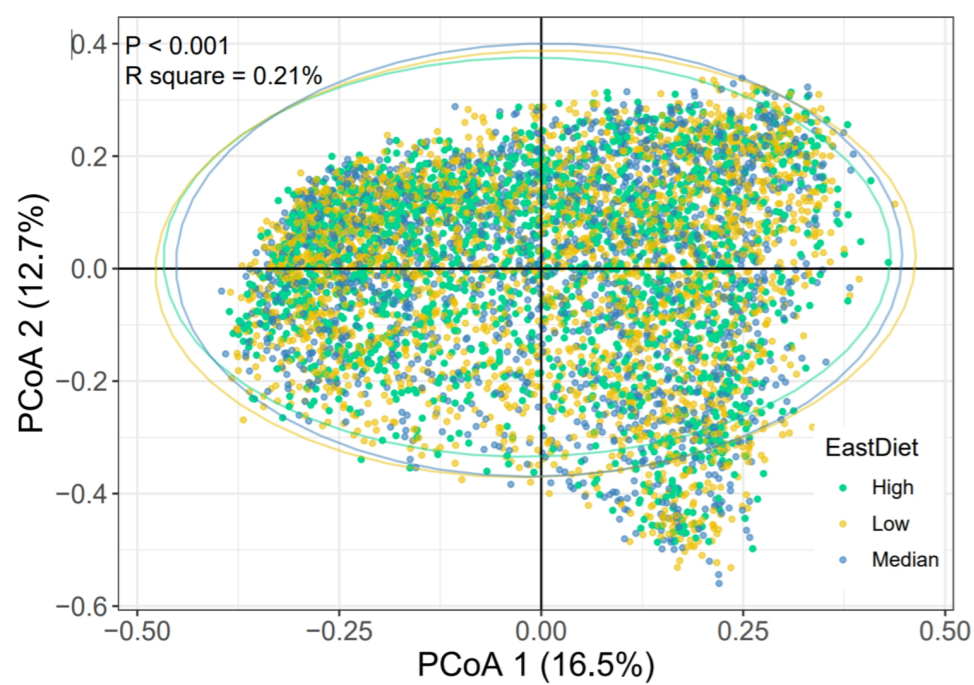

**C**

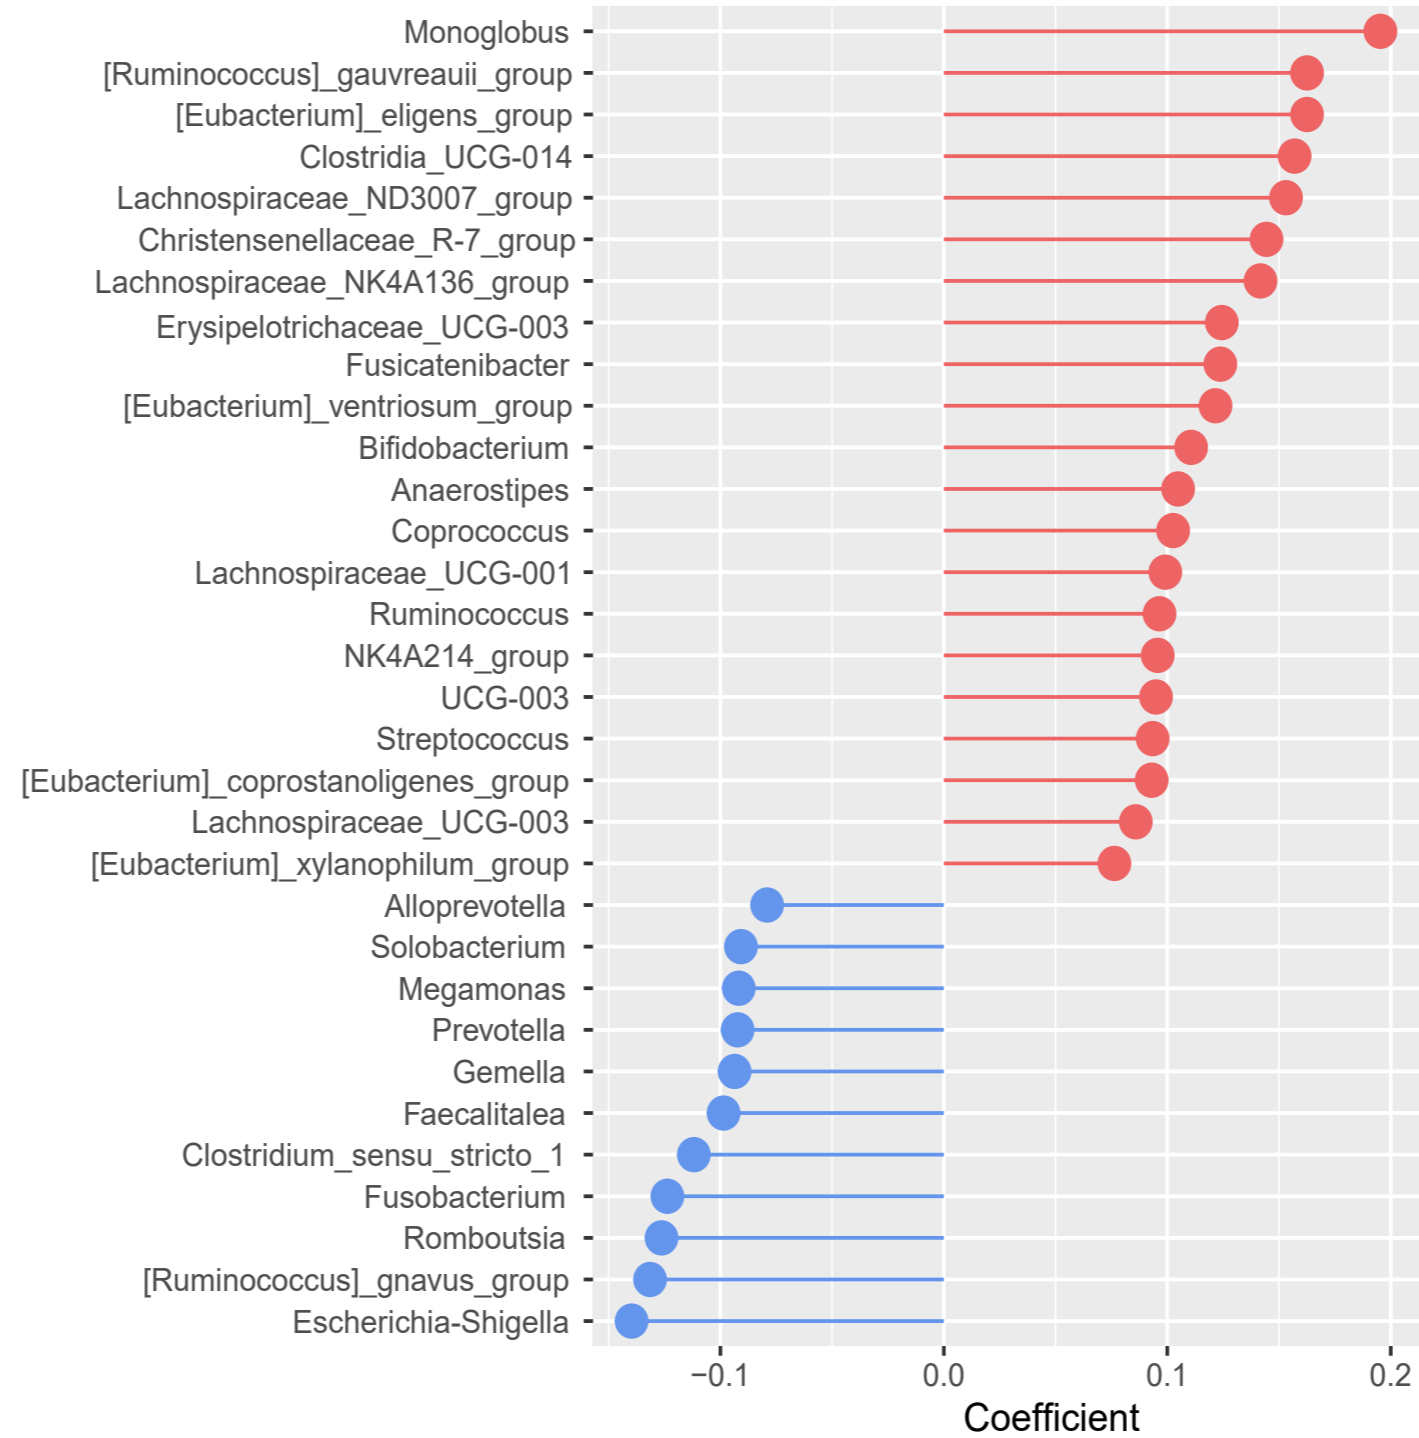

**D**

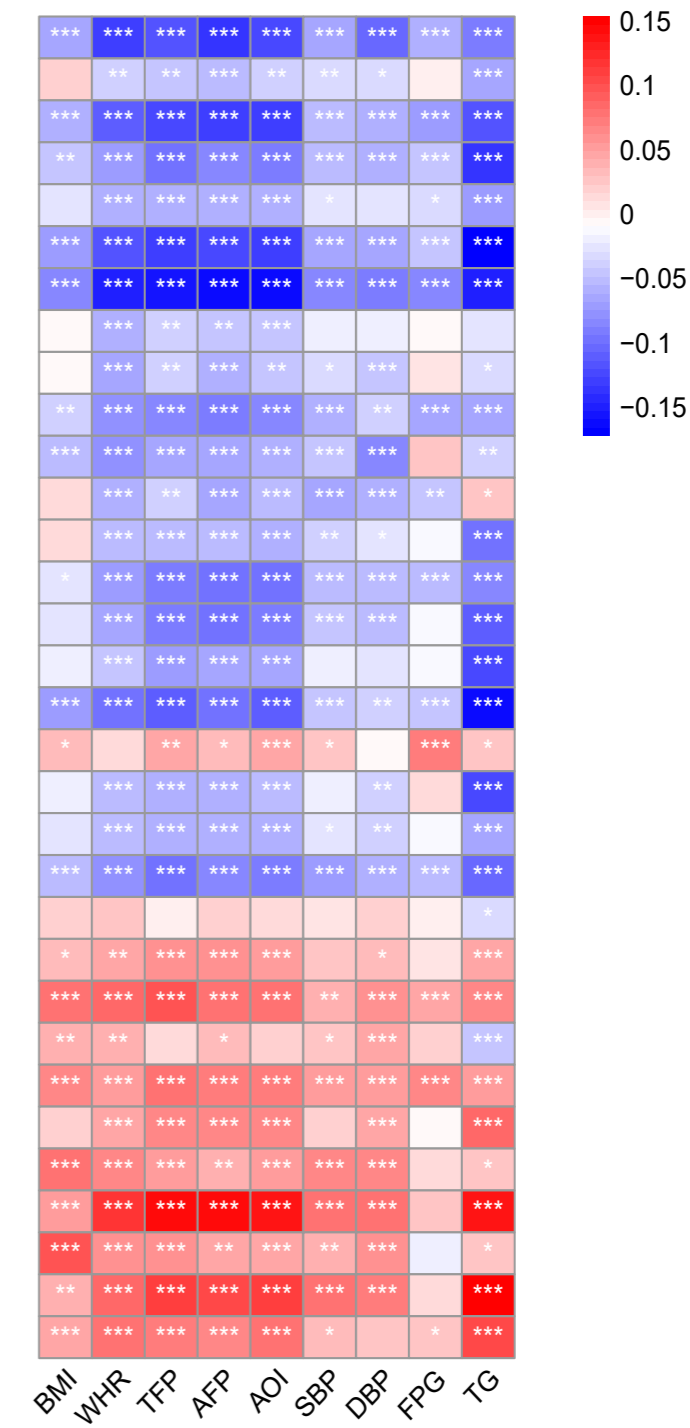

Source: https://medrxiv.org/content/10.1101/2024.07.10.24310112v1.full.pdf
